# Supplementary material for: Asymmetric electrocarboxylation of 4′-methylacetophenone over PrCoO3perovskites
Source: Royal Society of Chemistry journal article supplement (doi:10.1039/d2cy00116k), 2022-01-01
Supplement: d2cy00116k1.pdf [file d2cy00116k1.pdf]

## Supporting Information for

# Asymmetric Electrocarboxylation of 4'-methylacetophenone over PrCoO<sub>3</sub> Perovskites

Yi-Jun Zhao, Li-Rong Yang, Le-Ting Wang, Ying-Wang, Jia-Xing Lu \*and Huan Wang \*

*Shanghai Key Laboratory of Green Chemistry and Chemical Processes, School of Chemistry  
and Molecular Engineering, East China Normal University, Shanghai, 200062, China*

*\* Corresponding Authors: [jxlu@chem.ecnu.edu.cn](mailto:jxlu@chem.ecnu.edu.cn), [hwang@chem.ecnu.edu.cn](mailto:hwang@chem.ecnu.edu.cn)*

### 1. Supplementary Methods

The product obtained by asymmetric electrocarboxylation of 4'-methylacetophenone is 2-hydroxy-2-(4-methylphenyl)propanoic acid. The ee value and yield are both detected by HPLC. The specific detection method is as follows: chiral chromatographic column: AD-H, the mobile phase ratio: n-hexane: isopropanol: trifluoroacetic acid = 80:20:1, the UV detection wavelength: 235 nm, the mobile phase flow rate: 0.50 mL/min, the injection volume: 20 μL. Peaks of both R and S configurations of 2-hydroxy-2-(4-methylphenyl)propanoic acid (**Fig. S1**) can be detected by HPLC.

The ee value of the product is determined by the peak integral area corresponding to the two configurations of R and S in **Fig. S2**, using the following formula:

$$ee = \frac{|[R] - [S]|}{[R] + [S]} \times 100\%$$

Where [R] and [S] are corresponded to the peak integrated areas of the R and S configuration products from the HPLC chart, respectively.

The yield of the product was calculated from the sum of the areas of the two peaks, ie, [R]+[S], according to the calibration curve.

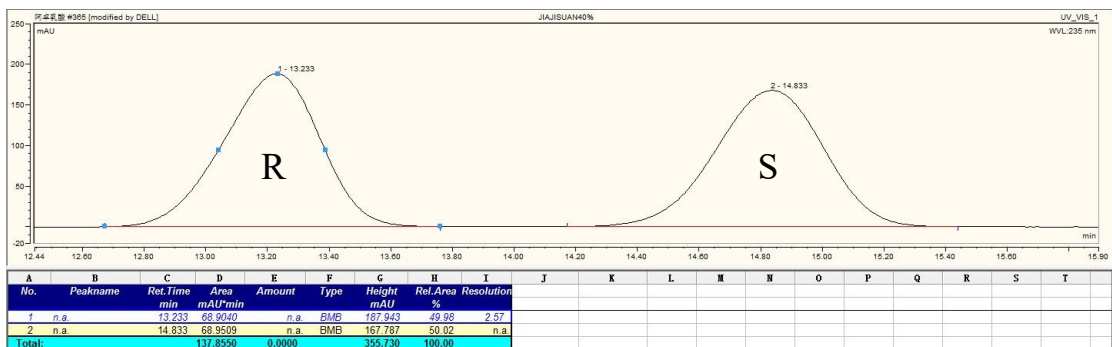

Fig. S1 HPLC chromatogram of standard product.

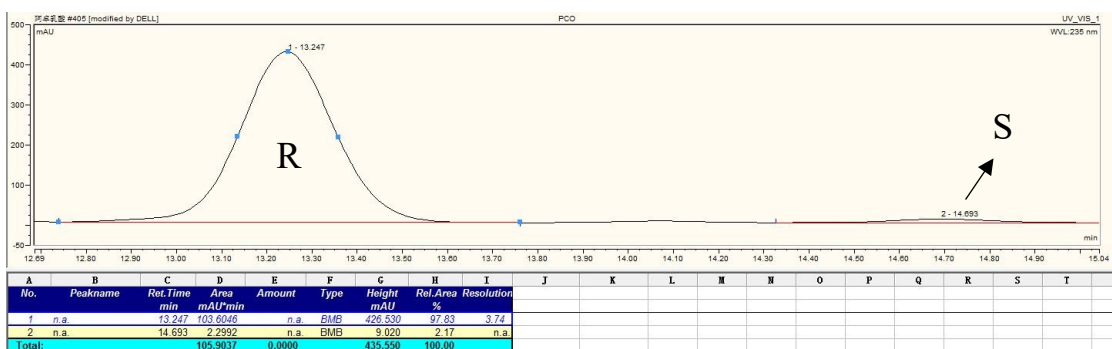

Fig. S2 HPLC chromatogram of post-electrolysis solution obtained on PrCoO<sub>3</sub> cathode.

## 2. Supplementary Figures

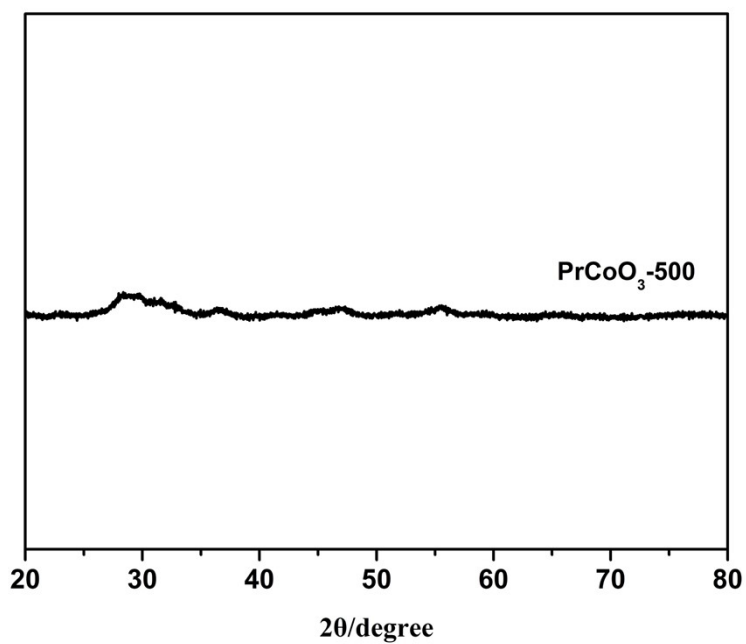

Fig. S3 XRD pattern of PrCoO<sub>3</sub>-500.

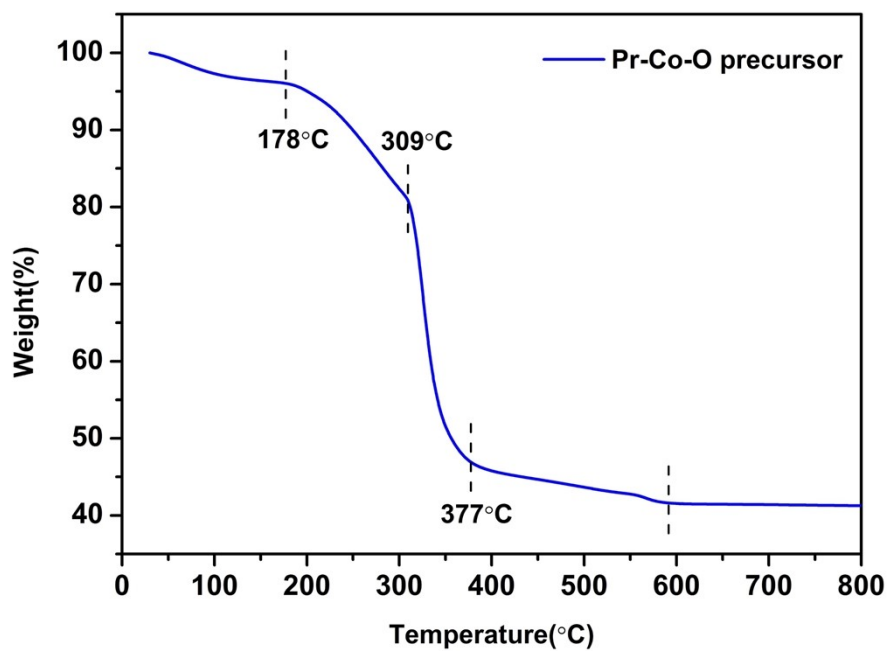

Fig. S4 TGA curve of Pr-Co-O precursor.

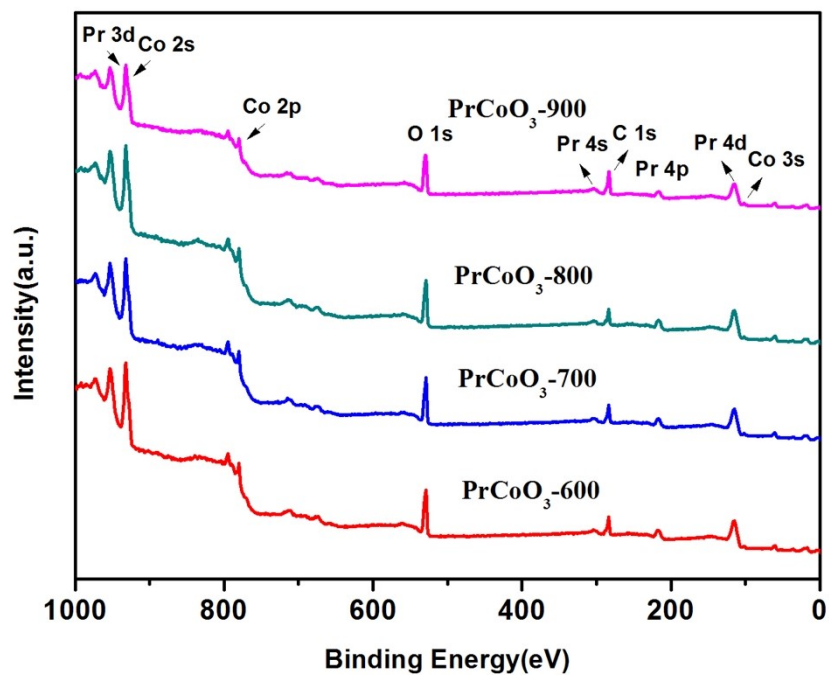

Fig. S5 XPS spectra of PrCoO<sub>3</sub>-T.

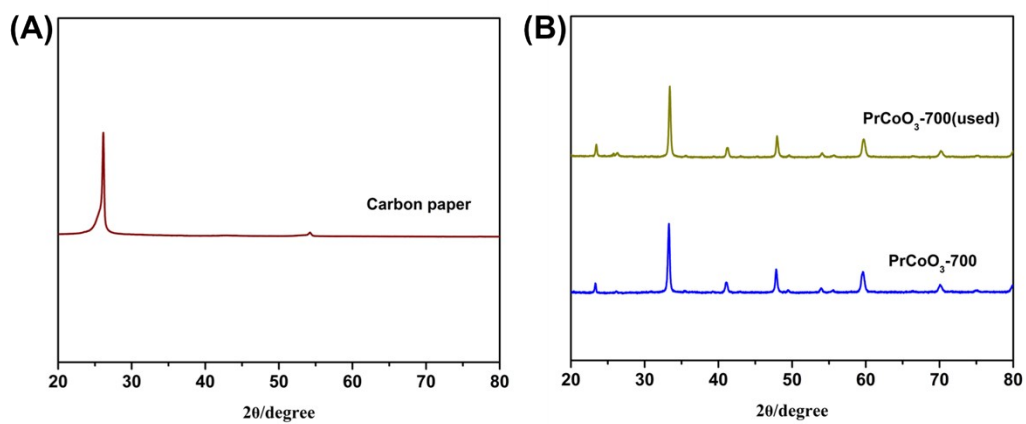

Fig. S6 XRD patterns of (A) PrCoO<sub>3</sub>-700 before and after use and (B) CP.

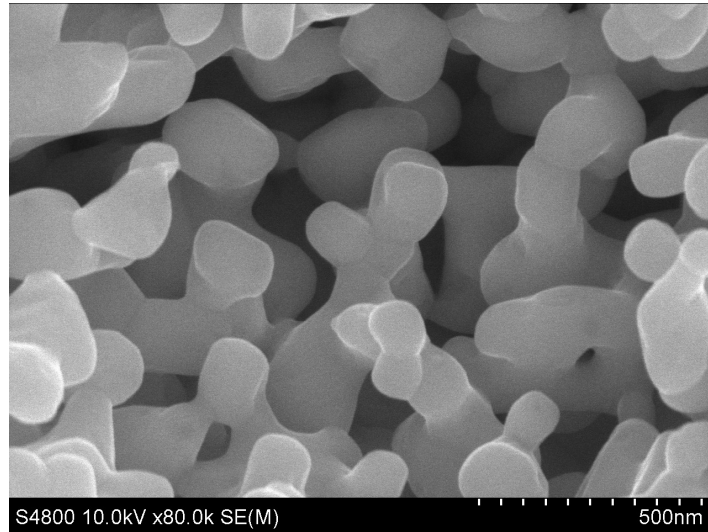

**Fig. S7** SEM image of used  $\text{PrCoO}_3\text{-700}$ .

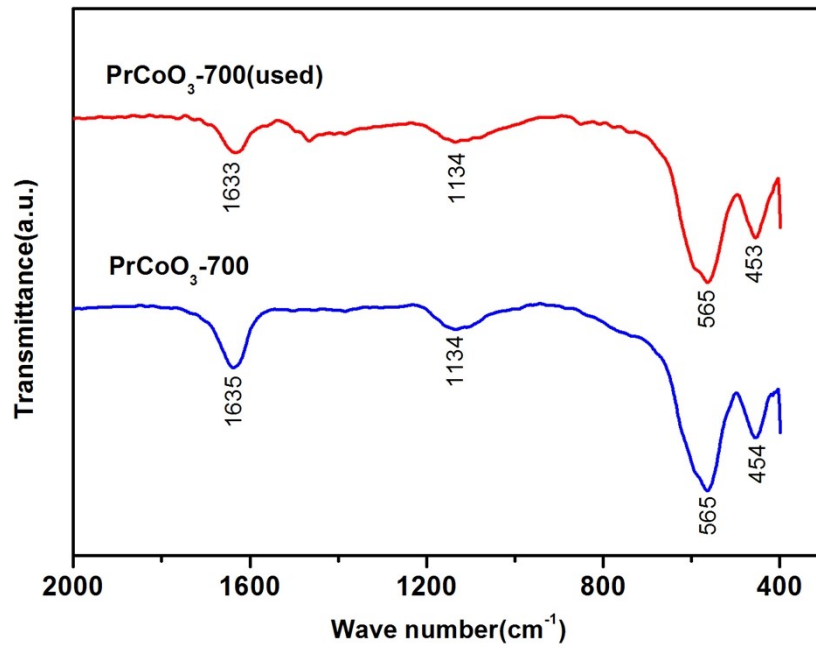

**Fig. S8** FT-IR spectra of  $\text{PrCoO}_3\text{-700}$  before and after use.

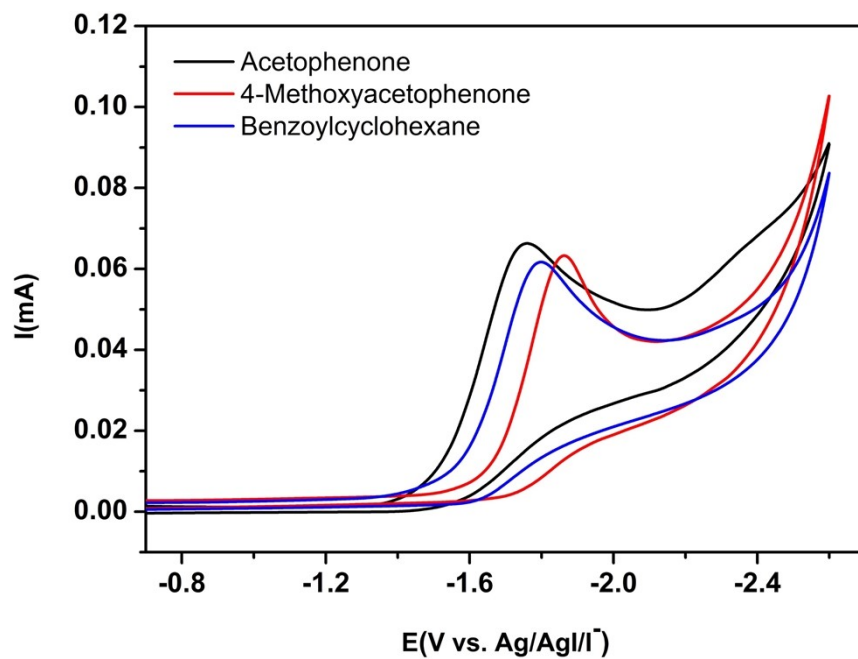

**Fig. S9** Cyclic voltammograms of 10 mM different aromatic ketones in DMF-0.1 M TEAI with the scan rate of  $0.1 \text{ V s}^{-1}$  under  $\text{CO}_2$  atmosphere on  $\text{PrCoO}_3$ -700.

### 3. Supplementary Tables

**Table S1** O 1s and Co 2p<sub>3/2</sub> XPS analyses of PrCoO<sub>3</sub>-T

| Material                | O <sub>A</sub> :O <sub>L</sub> | Co <sup>3+</sup> /Co <sup>2</sup> |
|-------------------------|--------------------------------|-----------------------------------|
| PrCoO <sub>3</sub> -600 | 1.02                           | 2.69                              |
| PrCoO <sub>3</sub> -700 | 1.65                           | 2.78                              |
| PrCoO <sub>3</sub> -800 | 1.07                           | 2.48                              |
| PrCoO <sub>3</sub> -900 | 1.01                           | 2.34                              |

**Table S2** Compared of PrCoO<sub>3</sub> for asymmetric electrocarboxylation of aromatic ketones with other published methods

| Substrate                                                                           | Electrode                                                                      | Inducer                | Yield (%) <sup>b</sup> | ee (%) <sup>c</sup> | Ref.      |
|-------------------------------------------------------------------------------------|--------------------------------------------------------------------------------|------------------------|------------------------|---------------------|-----------|
| 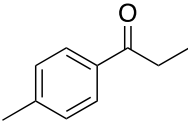   | Ss                                                                             | CN                     | 37.4                   | S-32.8              | [1]       |
|                                                                                     | Ss                                                                             | CD                     | 24.5                   | R-29.8              | [2]       |
|  | LaFeO <sub>3</sub>                                                             | t-Bu(R,R)salen(Co(II)) | 50                     | R-82                | [3]       |
|                                                                                     | La <sub>7</sub> Sr <sub>3</sub> Fe <sub>8</sub> Ni <sub>2</sub> O <sub>3</sub> | t-Bu(R,R)salen(Co(II)) | 79                     | R-94                | [4]       |
|                                                                                     | PrCoO <sub>3</sub>                                                             | t-Bu(R,R)salen(Co(II)) | 54                     | R-95                | This work |

<sup>a</sup> Solvent: DMF. Anode: Pt Mesh. Supporting electrolyte: 0.1 M TEAI. Substrate concentration: 50 mM. Inducer concentration: 2.5 mM. P(CO<sub>2</sub>): 1×10<sup>5</sup> Pa. Temperature: 20°C.

<sup>b</sup> The yield was based on the substrate.

<sup>c</sup> The ee was determined by HPLC analysis. R- (S-): Rectus (Sinister) configuration dominated.

#### 4. References

- [1] S.-F. Zhao, M.-X. Zhu, K. Zhang, H. Wang and J.-X. Lu, *Tetrahedron Letters*, 2011, **52**, 2702-2705.
- [2] K. Zhang, H. Wang, S.-F. Zhao, D.-F. Niu and J.-X. Lu, *Journal of Electroanalytical Chemistry*, 2009, **630**, 35-41.
- [3] L.-R. Yang, J.-J. Zhang, Y.-J. Zhao, Z.-L. Wang, H. Wang and J.-X. Lu, *Electrochimica Acta*, 2021, **398**, 139308-139316.
- [4] L.-R. Yang, Y.-J. Zhao, C.-J. Jiang, R. Xiong, H. Wang and J.-X. Lu, *Journal of Catalysis*, 2021, **401**, 224-233.
